# Supplementary material for: The Reversal of Bleeding Caused by New Oral Anticoagulants (NOACs): A Systematic Review and Meta-Analysis
Source: PubMed Central journal article supplement — Clin Appl Thromb Hemost. 2018 Sep 3;24(9 Suppl):117S–126S. doi: 10.1177/1076029618796339 (PMC6714855; doi:10.1177/1076029618796339), 2018-09-03
Supplement: Appendix_revise_11-06-2018.pdf [file Appendix_revise_11-06-2018.pdf]

## **Appendix**

Appendix A. Search terms and strategies

Appendix B. Description of NOACs and reversal agents

Appendix C. Criteria for justification of reversal outcome

Appendix D. Comparison of characteristics between reversal outcomes

Appendix E. Proportions of bleeding sites in each group of interested interventions

Appendix F. Comparison of characteristics between death outcomes

Appendix G. Incidence rate for cohort studies

Appendix H. Characteristics and endpoints of case report/series

## Appendix A. Search terms and strategies

| PICO    | Search Number | Search Terms                                                                                                                                                                                                                                                                                                    |
|---------|---------------|-----------------------------------------------------------------------------------------------------------------------------------------------------------------------------------------------------------------------------------------------------------------------------------------------------------------|
| P       | #1            | NOAC OR “New oral anticoagulants” OR “Novel oral anticoagulants” OR DOAC OR “Direct oral anticoagulants” OR “Non vitamin K antagonist” OR “Factor Xa inhibitor” OR “Factor IIa inhibitor” OR “factor-specific oral anticoagulants” OR “thrombin inhibitor” OR Dabigatran OR Rivaroxaban OR Apixaban OR Edoxaban |
| I       | #2            | Idarucizumab OR Praxbind                                                                                                                                                                                                                                                                                        |
|         | #3            | “Andexanet alfa” OR Andexxa                                                                                                                                                                                                                                                                                     |
|         | #4            | PCC OR “Prothrombin complex concentrate” OR Cofact                                                                                                                                                                                                                                                              |
|         | #5            | “Activated prothrombin complex concentrate” OR FEIBA                                                                                                                                                                                                                                                            |
|         | #6            | rFVIIa OR “Recombinant factor VIIa” OR Novoseven                                                                                                                                                                                                                                                                |
|         | #7            | FFP OR “Fresh frozen plasma”                                                                                                                                                                                                                                                                                    |
|         | #8            | #2 OR #3 OR #4 OR #5 OR #6 OR #7                                                                                                                                                                                                                                                                                |
| C       |               | -                                                                                                                                                                                                                                                                                                               |
| O       |               | -                                                                                                                                                                                                                                                                                                               |
| P AND I |               | #1 AND #8                                                                                                                                                                                                                                                                                                       |

## Appendix B. Description of NOACs and reversal agents

|                                             | <b>n</b> |                      |
|---------------------------------------------|----------|----------------------|
| Indications of NOAC, n (%)                  | 220      |                      |
| AF                                          |          | 188 (85.45)          |
| VTE                                         |          | 10 (4.55)            |
| AF/VTE                                      |          | 22 (10.00)           |
| Types of NOAC, n (%)                        | 220      |                      |
| Dabigatran                                  |          | 136 (61.82)          |
| Rivaroxaban                                 |          | 68 (30.91)           |
| Apixaban                                    |          | 16 (7.27)            |
| Doses of NOACs per day, mg, mean (SD)       |          |                      |
| Dabigatran                                  | 94       | 265.85 (41.36)       |
| Rivaroxaban                                 | 31       | 18.55 (4.32)         |
| Apixaban                                    | 9        | 7.78 (2.64)          |
| Time since last dose, hours, median (range) | 56       | 11.50 (1, 96)        |
| Reversal agents, n (%)                      | 220      |                      |
| PCC                                         |          | 68 (30.91)           |
| Idarucizumab                                |          | 46 (20.91)           |
| FFP                                         |          | 29 (13.18)           |
| aPCC                                        |          | 28 (12.73)           |
| rFVIIa                                      |          | 13 (5.91)            |
| PCC + FFP                                   |          | 14 (6.36)            |
| rFVIIa + FFP                                |          | 10 (4.55)            |
| aPCC + idarucizumab                         |          | 2 (0.91)             |
| aPCC + FFP                                  |          | 5 (2.27)             |
| PCC + idarucizumab                          |          | 2 (0.91)             |
| PCC + rFVIIa                                |          | 3 (1.36)             |
| Doses of reversal agents                    |          |                      |
| PCC, Unit/kg, mean (SD)                     | 40       | 27.77 (12.72)        |
| Total PCC, Unit, mean (SD)                  | 56       | 2418.82 (1127.31)    |
| aPCC, Unit/kg, median (range)               | 30       | 28.75 (8.00, 100.00) |
| Total aPCC, Unit, mean (SD)                 | 13       | 2952.15 (1237.19)    |
| rFVIIa, mcg/kg, median (range)              | 5        | 48.90 (2.40, 90.00)  |
| Total rFVIIa, mg, median (range)            | 9        | 4.00 (2.00, 21.60)   |
| FFP, Unit, median (range)                   | 37       | 4.00 (1, 20)         |
| Idarucizumab, g, mean (SD)                  | 50       | 5.00 (0.0)           |

**Appendix C. Criteria for justification of reversal outcome**

| <b>Reversal criteria used for reversal judgment</b> | <b>n (%)</b> |
|-----------------------------------------------------|--------------|
| Bleeding cessation/stopped                          | 86 (39.09)   |
| No expansion of hematoma on CT scan                 | 68 (30.91)   |
| Survived/transferred/discharged                     | 29 (13.18)   |
| Clinically stable                                   | 23 (10.45)   |
| Normalization of coagulation parameters             | 14 (6.36)    |
| Total                                               | 220 (100.0)  |

#### Appendix D. Comparison of characteristics between reversal outcomes

| Characteristics                 | Reverse<br>n = 174    | Non-reverse<br>n = 46 | P-value |
|---------------------------------|-----------------------|-----------------------|---------|
| Sex, n (%)                      |                       |                       |         |
| Male                            | 95 (61.69)            | 25 (62.5)             | 0.925   |
| Female                          | 59 (38.31)            | 15 (37.5)             |         |
| Age, years, mean (SD)           | 77.82 (9.47)          | 75.44 (9.72)          | 0.144   |
| Medical history, n (%)          |                       |                       |         |
| Hypertension                    | 66 (52.8)             | 11 (40.74)            | 0.256   |
| Diabetes                        | 22 (17.6)             | 1 (3.7)               | 0.079   |
| Coronary artery disease         | 24 (19.2)             | 7 (25.93)             | 0.432   |
| Cerebrovascular disease         | 17 (13.6)             | 4 (14.81)             | 1.000   |
| Renal impairment                | 23 (18.40)            | 4 (14.81))            | 0.787   |
| Renal function on admission     |                       |                       |         |
| SCr, mg/dl, median (range)      | 1.8 (0.74, 11.27)     | 1.35 (0.80, 10.50)    | 0.610   |
| CrCl, ml/min, median (range)    | 46.40 (14.00, 113.00) | 55.5 (24.2, 110.0)    | 0.365   |
| Concomitant antiplatelet, n (%) | 32 (43.24)            | 4 (25.00)             | 0.177   |
| Cause of bleeding, n (%)        |                       |                       |         |
| Spontaneous                     | 116 (66.67)           | 30 (65.22)            | 0.769   |
| Trauma                          | 51 (29.31)            | 13 (28.26)            |         |
| Post-procedure                  | 7 (4.02)              | 3 (6.52)              |         |
| Site of bleeding, n (%)         |                       |                       |         |
| Intracranial                    | 88 (59.06)            | 26 (61.9)             | 0.712   |
| Gastrointestinal                | 37 (24.83)            | 8 (19.05)             |         |
| Other                           | 24 (16.11)            | 8 (19.05)             |         |
| Indications of NOAC, n (%)      |                       |                       |         |
| AF                              | 131 (87.92)           | 29 (69.05)            | 0.004   |
| VTE                             | 7 (4.7)               | 2 (4.76)              |         |
| AF/VTE                          | 11 (7.38)             | 11 (26.19)            |         |
| Type of NOAC, n (%)             |                       |                       |         |
| Dabigatran                      | 110 (63.22)           | 26 (56.52)            | 0.607   |
| Rivaroxaban                     | 51 (29.31)            | 17 (36.96)            |         |
| Apixaban                        | 13 (7.47)             | 3 (6.52)              |         |

**Appendix D. Comparison of characteristics between reversal outcomes (continue)**

| <b>Characteristics</b>                      | <b>Reverse<br/>n = 174</b> | <b>Non-reverse<br/>n = 46</b> | <b>P-value</b> |
|---------------------------------------------|----------------------------|-------------------------------|----------------|
| <b>Doses of NOACs, mg/day, mean (SD)</b>    |                            |                               |                |
| Dabigatran                                  | 261.43 (42.23)             | 285.88 (31.43)                | 0.027          |
| Rivaroxaban                                 | 19.20 (4.25)               | 15.83 (3.76)                  | 0.086          |
| Apixaban                                    | 7.14 (2.67)                | 10.0 (0.0)                    | 0.030          |
| Time since last dose, hours, median (range) | 12 (1, 96)                 | 12 (11, 24)                   | 0.712          |
| <b>Group of reversal agents, n (%)</b>      |                            |                               |                |
| Standard                                    | 123 (82.55)                | 40 (95.24)                    | 0.040          |
| Specific                                    | 26 (17.45)                 | 2 (4.76)                      |                |
| <b>Reversal agents, n (%)</b>               |                            |                               |                |
| PCC                                         | 55 (31.61)                 | 13 (28.26)                    | 0.014          |
| aPCC                                        | 22 (12.64)                 | 6 (13.04)                     |                |
| rFVIIa                                      | 7 (4.02)                   | 6 (13.04)                     |                |
| FFP                                         | 23 (13.22)                 | 6 (13.04)                     |                |
| Idarucizumab                                | 43 (24.71)                 | 3 (6.52)                      |                |
| Combined reversal agents                    | 24 (13.79)                 | 12 (26.09)                    |                |
| <b>Doses of reversal agents</b>             |                            |                               |                |
| PCC, Unit/kg, median (range)                | 25.00 (14.50, 63.00)       | 19.50 (8.5, 50)               | 0.915          |
| Total PCC, Unit, mean (SD)                  | 2476.39 (1150.96)          | 2154.00 (1023.63)             | 0.417          |
| Total rFVIIa, mg, median (range)            | 4.00 (2.00, 21.60)         | 7.50 (7.00, 8.00)             | 0.566          |
| FFP, Unit, median (range)                   | 3 (1, 20)                  | 6 (2, 20)                     | 0.162          |
| <b>Additional treatments for bleeding</b>   |                            |                               |                |
| Receiving PRBC transfusion, n (%)           | 49 (30.82)                 | 18 (40.00)                    | 0.247          |
| PRBC unit, median (range)                   | 3 (1, 25)                  | 8 (2, 32)                     | 0.003          |
| Receiving hemodialysis, n (%)               | 20 (12.9)                  | 7 (15.56)                     | 0.647          |

**Appendix E. Proportions of bleeding sites in each group of interested interventions**

| <b>Management</b> | <b>Site of Bleeding</b> |            |              | <b>Total</b> |
|-------------------|-------------------------|------------|--------------|--------------|
|                   | <b>ICH</b>              | <b>GI</b>  | <b>Other</b> |              |
| DTI-Standard      | 35 (40.70)              | 36 (41.86) | 15 (17.44)   | 86           |
| DTI-Specific      | 30 (60.00)              | 11 (22.00) | 9 (18.00)    | 50           |
| FXa-Standard      | 64 (76.19)              | 8 (9.52)   | 12 (14.29)   | 84           |
| Total             | 129 (58.64)             | 55 (25.00) | 36 (16.36)   | 220 (100.0)  |

## Appendix F. Comparison of characteristics between death outcomes

| <b>Characteristics</b>          | <b>Death<br/>n = 48</b> | <b>Alive<br/>n = 172</b> | <b>P-value</b> |
|---------------------------------|-------------------------|--------------------------|----------------|
| Sex, n (%)                      |                         |                          |                |
| Male                            | 29 (69.05)              | 91 (59.87)               | 0.278          |
| Female                          | 13 (30.95)              | 61 (40.13)               |                |
| Age, years, mean (SD)           | 78.02 (8.61)            | 77.16 (10.30)            | 0.592          |
| Medical history, n (%)          |                         |                          |                |
| Hypertension                    | 11 (33.33)              | 66 (55.46)               | 0.024          |
| Diabetes                        | 2 (6.06)                | 21 (17.65)               | 0.100          |
| Coronary artery disease         | 8 (24.24)               | 23 (19.33)               | 0.535          |
| Cerebrovascular disease         | 6 (18.18)               | 15 (12.61)               | 0.403          |
| Renal impairment                | 11 (26.19)              | 19 (12.10)               | 0.023          |
| Renal function at baseline      |                         |                          |                |
| CrCl, ml/min, median (range)    | 41.80 (33, 50.60)       | 40.75 (30.50, 100.00)    | 0.688          |
| Renal function on admission     |                         |                          |                |
| SCr, mg/dl, median (range)      | 2.05 (1.14, 10.50)      | 1.63 (0.74, 11.27)       | 0.668          |
| CrCl, ml/min, median (range)    | 35.60 (14.00, 70.00)    | 53.00 (14.00, 113.00)    | 0.271          |
| Concomitant antiplatelet, n (%) | 9 (52.94)               | 27 (36.99)               | 0.227          |
| Cause of bleeding, n (%)        |                         |                          |                |
| Spontaneous                     | 32 (66.67)              | 114 (66.28)              | 0.787          |
| Trauma                          | 13 (27.08)              | 51 (29.65)               |                |
| Post-procedure                  | 3 (6.25)                | 7 (4.07)                 |                |
| Site of bleeding, n (%)         |                         |                          |                |
| Intracranial                    | 29 (65.91)              | 85 (57.82)               | 0.502          |
| Gastrointestinal                | 10 (22.73)              | 35 (23.81)               |                |
| Other                           | 5 (11.36)               | 27 (18.37)               |                |
| Indications of NOAC, n (%)      |                         |                          |                |
| AF                              | 33 (75)                 | 127 (86.39)              | 0.106          |
| VTE                             | 2 (4.55)                | 7 (4.76)                 |                |
| AF/VTE                          | 9 (20.45)               | 13 (8.84)                |                |



**Appendix F. Comparison of characteristics between death outcomes (continue)**

| <b>Characteristics</b>                      | <b>Death<br/>n = 48</b> | <b>Alive<br/>n = 172</b> | <b>P-value</b> |
|---------------------------------------------|-------------------------|--------------------------|----------------|
| Type of NOAC, n (%)                         |                         |                          |                |
| Dabigatran                                  | 30 (62.50)              | 106 (61.63)              | 0.954          |
| Rivaroxaban                                 | 15 (31.25)              | 53 (30.81)               |                |
| Apixaban                                    | 3 (6.25)                | 13 (7.56)                |                |
| Doses of NOACs per day, mg, mean (SD)       |                         |                          |                |
| Dabigatran                                  | 280.00 (35.54)          | 262.03 (42.30)           | 0.085          |
| Rivaroxaban                                 | 18.75 (2.50)            | 18.52 (4.56)             | 0.922          |
| Apixaban                                    | -                       | 7.50 (2.67)              |                |
| Time since last dose, hours, median (range) | 11.00 (1.10, 28.00)     | 12.00 (1.00, 96.00)      | 0.809          |
| Group of reversal agents, n (%)             |                         |                          |                |
| Standard                                    | 42 (95.45)              | 121 (82.31)              | 0.031          |
| Specific                                    | 2 (4.55)                | 26 (17.69)               |                |
| Reversal agents, n (%)                      |                         |                          |                |
| PCC                                         | 15 (31.25)              | 53 (30.81)               | <0.001         |
| aPCC                                        | 3 (6.25)                | 25 (14.53)               |                |
| rFVIIa                                      | 7 (14.58)               | 6 (3.49)                 |                |
| FFP                                         | 6 (12.5)                | 23 (13.37)               |                |
| Idarucizumab                                | 3 (6.25)                | 43 (25.00)               |                |
| Combined reversal agents                    | 14 (29.17)              | 22 (12.79)               |                |
| Doses of reversal agents                    |                         |                          |                |
| PCC, Unit/kg, mean (SD)                     | 32.94 (15.23)           | 26.67 (12.11)            | 0.241          |
| Total PCC, Unit, mean (SD)                  | 3017.75 (1164.38)       | 2179.25 (1031.85)        | 0.011          |
| rFVIIa, mcg/kg, median (range)              | 69.5 (48.9, 90.0)       | 30.0 (2.4, 90.0)         | 0.374          |
| Total rFVIIa, mg, median (range)            | 8.00 (7.00, 8.00)       | 3.50 (2.00, 21.60)       | 0.117          |
| FFP, Unit, median (range)                   | 6.00 (2.00, 20.00)      | 3.50 (1.00, 20.00)       | 0.370          |
| Additional treatments for bleeding          |                         |                          |                |
| Receiving PRBC transfusion, n (%)           | 21 (50.00)              | 46 (28.40)               | 0.008          |
| PRBC unit, median (range)                   | 5.00 (2.00, 32.00)      | 3.00 (1.00, 25.00)       | 0.192          |
| Receiving hemodialysis, n (%)               | 9 (21.95)               | 18 (11.32)               | 0.076          |

## Appendix G. Incidence rate for cohort studies

| Author (year)   | Intervention | No.<br>subjects | No. reverse | IR/100 | 95% CI       |
|-----------------|--------------|-----------------|-------------|--------|--------------|
| <b>Reversal</b> |              |                 |             |        |              |
| Connolly (2016) | FXa-Specific | 46              | 37          | 80.43  | 66.83, 89.35 |
| Sin (2016)      | FXa-Standard | 9               | 7           | 77.78  | 45.26, 93.68 |
| Majeed (2017)   | FXa-Standard | 84              | 58          | 69.05  | 58.51, 77.92 |
| Harrison (2018) | FXa-Standard | 14              | 13          | 92.86  | 68.53, 98.73 |
| Schenk (2018)   | FXa-Standard | 13              | 10          | 76.92  | 49.74, 91.82 |
| Schulman (2018) | FXa-Standard | 66              | 43          | 65.15  | 53.11, 75.52 |
| Pollack (2017)  | DTI-Specific | 301             | 203         |        |              |
| Sin (2016)      | DTI-Standard | 2               | 1           | 50.00  | 9.45, 90.55  |
| Schulman (2017) | DTI-Standard | 14              | 9           | 64.29  | 38.76, 83.66 |
| <b>Death</b>    |              |                 |             |        |              |
| Connolly (2016) | FXa-Specific | 46              | 7           | 15.22  | 7.57, 28.22  |
| Bouget (2015)   | FXa-Standard | 6               | 2           | 33.33  | 9.68, 70.00  |
| Majeed (2017)   | FXa-Standard | 84              | 27          | 32.14  | 23.13, 42.72 |
| Harrison (2018) | FXa-Standard | 14              | 2           | 14.29  | 4.01, 39.94  |
| Schenk (2018)   | FXa-Standard | 13              | 3           | 23.08  | 8.18, 50.26  |
| Schulman (2018) | FXa-Standard | 66              | 9           | 13.64  | 7.34, 23.93  |
| Pollack (2017)  | DTI-Specific | 301             | 19          | 6.31   | 4.08, 9.65   |
| Smythe (2015)   | DTI-Standard | 4               | 2           | 50.0   | 15.0, 85.0   |
| Schulman (2017) | DTI-Standard | 14              | 1           | 7.14   | 1.27, 31.47  |

## Appendix H. Characteristics and endpoints for case report/series

| Author              | Year | Sex | Age | Site of bleeding | NOAC        | Indication | Reversal agents   | Reversal | Death |
|---------------------|------|-----|-----|------------------|-------------|------------|-------------------|----------|-------|
| Alhashem HM.        | 2017 | M   | 65  | GI               | Dabigatran  | AF         | aPCC+Idarucizumab | yes      | no    |
| Ali AN.             | 2013 | M   | 89  | GI               | Dabigatran  | AF         | PCC+FFP           | yes      | no    |
| Arai N.             | 2018 | M   | 79  | ICH              | Dabigatran  | AF         | Idarucizumab      | yes      | no    |
| Aron J.             | 2014 | M   | 76  | ICH              | Dabigatran  | AF         | rFVIIa            | yes      | yes   |
| Bene J.             | 2012 | F   | 79  | GI               | Dabigatran  | AF         | FFP               | yes      | no    |
| Beyer-Westendorf J. | 2014 | M   | 80  | ICH              | Rivaroxaban | AF         | PCC+FFP           | yes      | yes   |
| Beyer-Westendorf J. | 2014 | M   | 75  | Other            | Rivaroxaban | VTE        | PCC               | yes      | no    |
| Beyer-Westendorf J. | 2014 | M   | 82  | ICH              | Rivaroxaban | AF         | PCC               | yes      | yes   |
| Beyer-Westendorf J. | 2014 | F   | 77  | GI               | Rivaroxaban | VTE        | PCC               | yes      | no    |
| Beyer-Westendorf J. | 2014 | M   | 64  | GI               | Rivaroxaban | AF         | PCC               | yes      | no    |
| Beyer-Westendorf J. | 2014 | F   | 82  | Other            | Rivaroxaban | AF         | PCC+FFP           | yes      | no    |
| Beynon C.           | 2015 | M   | 76  | ICH              | Apixaban    | AF         | PCC               | yes      | no    |
| Beynon C.           | 2015 | F   | 78  | ICH              | Apixaban    | AF         | PCC               | yes      | no    |
| Beynon C.           | 2015 | F   | 77  | ICH              | Rivaroxaban | AF/VTE     | PCC               | no       | no    |
| Beynon C.           | 2015 | M   | 89  | ICH              | Rivaroxaban | AF/VTE     | PCC+FFP           | no       | yes   |
| Beynon C.           | 2015 | M   | 73  | ICH              | Rivaroxaban | AF/VTE     | PCC               | no       | no    |
| Beynon C.           | 2015 | M   | 80  | ICH              | Rivaroxaban | AF/VTE     | PCC               | no       | yes   |
| Brewer DC.          | 2016 | M   | 79  | Other            | Rivaroxaban | AF         | PCC               | yes      | no    |
| Cano EL.            | 2012 | F   | 78  | GI               | Dabigatran  | AF         | PCC+FFP           | no       | yes   |
| Cebeci E.           | 2016 | M   | 54  | Other            | Dabigatran  | AF         | FFP               | yes      | no    |

**Appendix H. Characteristics and endpoints for case report/series (continue)**

| Author          | Year | Sex | Age | Site of bleeding | NOAC        | Indication | Reversal agents | Reversal | Death |
|-----------------|------|-----|-----|------------------|-------------|------------|-----------------|----------|-------|
| Chang DN.       | 2013 | M   | 94  | ICH              | Dabigatran  | AF         | aPCC            | yes      | no    |
| Chen BC.        | 2012 | M   | 79  | GI               | Dabigatran  | AF         | PCC+FFP         | no       | yes   |
| Chen BC.        | 2012 | M   | 86  | GI               | Dabigatran  | AF         | FFP             | yes      | no    |
| Chen BC.        | 2013 | M   | 80  | Other            | Dabigatran  | AF         | FFP             | yes      | no    |
| Chic Acevedo C. | 2015 | F   | 51  | GI               | Rivaroxaban | AF         | PCC             | yes      | no    |
| Chung MC.       | 2016 | M   | 70  | Other            | Dabigatran  | AF         | FFP             | yes      | no    |
| Cohen M.        | 2017 | M   | 69  | GI               | Rivaroxaban | AF         | FFP             | yes      | no    |
| Crapelli GB.    | 2016 | F   | 84  | Other            | Dabigatran  | AF         | PCC+rFVIIa      | no       | yes   |
| Cronin J.       | 2014 | F   | 84  | GI               | Dabigatran  | AF         | PCC             | yes      | no    |
| Dager WE.       | 2013 | F   | 67  | Other            | Dabigatran  | AF         | aPCC+FFP        | yes      | no    |
| Denetclaw TH.   | 2016 | F   | 88  | Other            | Apixaban    | AF         | PCC             | yes      | no    |
| Diaz MQ.        | 2013 | M   | 76  | GI               | Dabigatran  | AF         | PCC             | yes      | no    |
| Diaz MQ.        | 2013 | F   | 82  | GI               | Dabigatran  | AF         | PCC             | yes      | no    |
| Diaz MQ.        | 2013 | M   | 83  | GI               | Dabigatran  | AF         | PCC             | yes      | no    |
| Diaz MQ.        | 2013 | M   | 82  | GI               | Dabigatran  | AF         | PCC             | yes      | no    |
| Diaz MQ.        | 2013 | M   | 88  | GI               | Dabigatran  | AF         | PCC             | yes      | yes   |
| Dibu JR.        | 2016 | F   | 81  | ICH              | Rivaroxaban | AF         | aPCC            | yes      | no    |
| Dibu JR.        | 2016 | M   | 69  | ICH              | Dabigatran  | AF         | aPCC            | yes      | no    |
| Dibu JR.        | 2016 | M   | 49  | ICH              | Rivaroxaban | AF         | aPCC            | yes      | no    |
| Dibu JR.        | 2016 | F   | 81  | ICH              | Apixaban    | AF         | aPCC            | yes      | no    |

**Appendix H. Characteristics and endpoints for case report/series (continue)**

| Author       | Year | Sex | Age | Site of bleeding | NOAC        | Indication | Reversal agents   | Reversal | Death |
|--------------|------|-----|-----|------------------|-------------|------------|-------------------|----------|-------|
| Dibu JR.     | 2016 | M   | 81  | ICH              | Rivaroxaban | AF         | aPCC              | yes      | no    |
| Dumkow LE.   | 2012 | M   | 85  | GI               | Dabigatran  | AF         | PCC+FFP           | yes      | yes   |
| Durie R.     | 2016 | M   | 60  | ICH              | Apixaban    | AF         | PCC+FFP           | no       | yes   |
| Edwards G.   | 2018 | M   | 63  | ICH              | Dabigatran  | AF         | PCC+Idarucizumab  | yes      | no    |
| Egger F.     | 2016 | F   | 78  | Other            | Rivaroxaban | AF         | PCC               | yes      | no    |
| Evans NR.    | 2016 | M   | 78  | ICH              | Dabigatran  | AF         | aPCC              | yes      | no    |
| Faust AC.    | 2014 | M   | 85  | ICH              | Dabigatran  | AF         | aPCC              | yes      | no    |
| Faust AC.    | 2016 | F   | 91  | ICH              | Rivaroxaban | VTE        | PCC+FFP           | yes      | yes   |
| Faust AC.    | 2016 | F   | 83  | ICH              | Rivaroxaban | AF         | PCC+FFP           | yes      | no    |
| Faust AC.    | 2016 | M   | 72  | ICH              | Rivaroxaban | AF         | PCC+FFP           | yes      | no    |
| Faust AC.    | 2018 | M   | 77  | ICH              | Apixaban    | AF         | PCC               | yes      | no    |
| Faust AC.    | 2018 | M   | 85  | ICH              | Apixaban    | AF         | PCC+FFP           | yes      | no    |
| Fellows SE.  | 2013 | M   | 85  | GI               | Dabigatran  | AF         | FFP               | yes      | no    |
| Garber ST.   | 2012 | M   | 83  | ICH              | Dabigatran  | AF         | rFVIIa            | no       | yes   |
| Gendron N.   | 2017 | F   | 96  | GI               | Dabigatran  | AF         | Idarucizumab      | yes      | no    |
| Gendron N.   | 2017 | F   | 77  | GI               | Dabigatran  | AF         | Idarucizumab      | yes      | no    |
| Gendron N.   | 2017 | M   | 80  | ICH              | Dabigatran  | AF         | aPCC+Idarucizumab | yes      | no    |
| Giustozzi M. | 2017 | M   | 80  | GI               | Dabigatran  | AF         | Idarucizumab      | yes      | no    |
| Giustozzi M. | 2017 | F   | 85  | Other            | Dabigatran  | AF         | Idarucizumab      | yes      | no    |

**Appendix H. Characteristics and endpoints for case report/series (continue)**

| Author      | Year | Sex | Age | Site of bleeding | NOAC        | Indication | Reversal agents | Reversal | Death |
|-------------|------|-----|-----|------------------|-------------|------------|-----------------|----------|-------|
| Goriacko P. | 2017 | M   | 53  | Other            | Dabigatran  | AF         | Idarucizamab    | yes      | no    |
| Goriacko P. | 2017 | M   | 79  | ICH              | Dabigatran  | AF         | Idarucizamab    | yes      | no    |
| Goriacko P. | 2017 | F   | 82  | GI               | Dabigatran  | AF         | Idarucizamab    | yes      | no    |
| Goriacko P. | 2017 | F   | 82  | GI               | Dabigatran  | AF         | Idarucizamab    | yes      | no    |
| Goriacko P. | 2017 | F   | 82  | GI               | Dabigatran  | AF         | Idarucizamab    | yes      | no    |
| Grandhi R.  | 2015 | M   | 74  | ICH              | Rivaroxaban | AF         | PCC             | yes      | no    |
| Grandhi R.  | 2015 | M   | 87  | ICH              | Apixaban    | AF         | PCC             | yes      | yes   |
| Grandhi R.  | 2015 | F   | 80  | ICH              | Rivaroxaban | AF         | PCC             | yes      | yes   |
| Grandhi R.  | 2015 | M   | 85  | ICH              | Rivaroxaban | AF         | PCC             | yes      | no    |
| Grandhi R.  | 2015 | F   | 83  | ICH              | Rivaroxaban | AF         | PCC             | yes      | no    |
| Grandhi R.  | 2015 | M   | 56  | ICH              | Rivaroxaban | AF         | PCC             | yes      | yes   |
| Grandhi R.  | 2015 | F   | 81  | ICH              | Rivaroxaban | AF         | PCC             | yes      | no    |
| Grandhi R.  | 2015 | M   | 81  | ICH              | Rivaroxaban | AF         | PCC             | yes      | no    |
| Grandhi R.  | 2015 | M   | 83  | ICH              | Rivaroxaban | AF         | PCC             | yes      | yes   |
| Grandhi R.  | 2015 | M   | 83  | ICH              | Apixaban    | AF         | PCC             | yes      | yes   |
| Grandhi R.  | 2015 | F   | 88  | ICH              | Rivaroxaban | AF         | PCC             | yes      | no    |
| Grandhi R.  | 2015 | M   | 85  | ICH              | Rivaroxaban | AF         | PCC             | yes      | no    |
| Grandhi R.  | 2015 | M   | 96  | ICH              | Rivaroxaban | AF         | PCC             | yes      | yes   |
| Grandhi R.  | 2015 | F   | 76  | ICH              | Rivaroxaban | AF         | PCC             | yes      | no    |

**Appendix H. Characteristics and endpoints for case report/series (continue)**

| Author         | Year | Sex | Age | Site of bleeding | NOAC        | Indication | Reversal agents | Reversal | Death |
|----------------|------|-----|-----|------------------|-------------|------------|-----------------|----------|-------|
| Grandhi R.     | 2015 | F   | 88  | ICH              | Rivaroxaban | AF         | PCC             | no       | no    |
| Grandhi R.     | 2015 | M   | 74  | ICH              | Rivaroxaban | AF         | PCC             | yes      | no    |
| Harinstein LM. | 2013 | M   | 84  | GI               | Dabigatran  | AF         | rFVIIa+FFP      | yes      | no    |
| Held V.        | 2016 | F   | 74  | ICH              | Dabigatran  | AF         | Idarucizumab    | yes      | no    |
| Held V.        | 2016 | M   | 76  | ICH              | Dabigatran  | AF         | Idarucizumab    | yes      | no    |
| Hofer S.       | 2016 | F   | 82  | Other            | Dabigatran  | AF         | Idarucizumab    | yes      | no    |
| Htun K.        | 2014 | M   | 72  | ICH              | Dabigatran  | AF         | rFVIIa          | yes      | no    |
| Jones JM.      | 2016 | M   | 71  | GI               | Dabigatran  | AF         | PCC+FFP         | yes      | no    |
| Kasliwal MK.   | 2015 | M   | 83  | ICH              | Rivaroxaban | AF         | aPCC            | yes      | no    |
| Kaur U.        | 2018 | F   | 65  | ICH              | Dabigatran  | VTE        | FFP             | no       | yes   |
| Kermer P.      | 2017 | M   | 76  | ICH              | Dabigatran  | AF         | Idarucizumab    | yes      | no    |
| Kermer P.      | 2017 | M   | 65  | ICH              | Dabigatran  | AF         | Idarucizumab    | yes      | no    |
| Kermer P.      | 2017 | F   | 83  | ICH              | Dabigatran  | AF         | Idarucizumab    | yes      | no    |
| Kermer P.      | 2017 | F   | 74  | ICH              | Dabigatran  | AF         | Idarucizumab    | yes      | no    |
| Kermer P.      | 2017 | F   | 82  | ICH              | Dabigatran  | AF         | Idarucizumab    | yes      | no    |
| Kermer P.      | 2017 | F   | 78  | ICH              | Dabigatran  | AF         | Idarucizumab    | no       | yes   |
| Kermer P.      | 2017 | M   | 71  | ICH              | Dabigatran  | AF         | Idarucizumab    | yes      | no    |
| Kermer P.      | 2017 | F   | 73  | ICH              | Dabigatran  | AF         | Idarucizumab    | no       | no    |
| Kermer P.      | 2017 | M   | 83  | ICH              | Dabigatran  | AF         | Idarucizumab    | yes      | no    |
| Kermer P.      | 2017 | M   | 78  | ICH              | Dabigatran  | AF         | Idarucizumab    | yes      | no    |

**Appendix H. Characteristics and endpoints for case report/series (continue)**

| Author        | Year | Sex | Age | Site of bleeding | NOAC        | Indication | Reversal agents | Reversal | Death |
|---------------|------|-----|-----|------------------|-------------|------------|-----------------|----------|-------|
| Kerner P.     | 2017 | M   | 56  | ICH              | Dabigatran  | AF         | Idarucizamab    | yes      | no    |
| Kerner P.     | 2017 | F   | 86  | ICH              | Dabigatran  | AF         | Idarucizamab    | yes      | no    |
| Kernan L.     | 2012 | M   | 92  | GI               | Dabigatran  | VTE        | FFP             | no       | yes   |
| Kham NM.      | 2016 | M   | 63  | Other            | Rivaroxaban | AF         | FFP             | yes      | no    |
| Kham NM.      | 2016 | M   | 63  | Other            | Rivaroxaban | AF         | FFP             | yes      | no    |
| Kiraly A.     | 2013 | M   | 86  | Other            | Rivaroxaban | AF         | aPCC+FFP        | yes      | no    |
| Kiraly A.     | 2013 | M   | 69  | ICH              | Dabigatran  | AF         | aPCC            | yes      | no    |
| Kizilirmak F. | 2016 | F   | 66  | Other            | Dabigatran  | AF         | FFP             | yes      | no    |
| Klusak A.     | 2014 | M   | 68  | ICH              | Rivaroxaban | AF         | PCC             | yes      | no    |
| Lal Y.        | 2013 | F   | 64  | ICH              | Dabigatran  | AF         | FFP             | yes      | yes   |
| Lal Y.        | 2013 | F   | 80  | ICH              | Dabigatran  | AF         | FFP             | no       | yes   |
| Lo JC.        | 2014 | M   | 92  | ICH              | Rivaroxaban | AF         | FFP             | no       | no    |
| Majeed A.     | 2016 | F   | 83  | GI               | Dabigatran  | AF/VTE     | rFVIIa          | no       | yes   |
| Majeed A.     | 2016 | M   | 79  | Other            | Dabigatran  | AF/VTE     | rFVIIa          | yes      | no    |
| Majeed A.     | 2016 | M   | 69  | Other            | Dabigatran  | AF/VTE     | rFVIIa          | no       | yes   |
| Majeed A.     | 2016 | M   | 79  | GI               | Dabigatran  | AF/VTE     | rFVIIa          | yes      | no    |
| Majeed A.     | 2016 | M   | 74  | Other            | Dabigatran  | AF/VTE     | PCC             | no       | yes   |
| Majeed A.     | 2016 | F   | 76  | GI               | Dabigatran  | AF/VTE     | rFVIIa          | yes      | no    |



**Appendix H. Characteristics and endpoints for case report/series (continue)**

| Author     | Year | Sex | Age | Site of bleeding | NOAC        | Indication | Reversal agents | Reversal | Death |
|------------|------|-----|-----|------------------|-------------|------------|-----------------|----------|-------|
| Majeed A.  | 2016 | M   | 77  | ICH              | Dabigatran  | AF/VTE     | PCC             | no       | yes   |
| Majeed A.  | 2016 | M   | 68  | Other            | Dabigatran  | AF/VTE     | rFVIIa          | no       | yes   |
| Majeed A.  | 2016 | F   | 68  | GI               | Dabigatran  | AF/VTE     | rFVIIa          | yes      | no    |
| Majeed A.  | 2016 | M   | 79  | ICH              | Dabigatran  | AF/VTE     | rFVIIa          | no       | yes   |
| Majeed A.  | 2016 | M   | 72  | GI               | Dabigatran  | AF/VTE     | rFVIIa          | no       | yes   |
| Mao G.     | 2017 | M   | 71  | ICH              | Rivaroxaban | AF         | aPCC            | yes      | no    |
| Mao G.     | 2017 | M   | 85  | ICH              | Rivaroxaban | AF         | aPCC            | yes      | no    |
| Mao G.     | 2017 | F   | 74  | ICH              | Apixaban    | AF         | aPCC            | yes      | no    |
| Mao G.     | 2017 | M   | 78  | ICH              | Rivaroxaban | AF         | aPCC            | no       | yes   |
| Mao G.     | 2017 | M   | 84  | ICH              | Rivaroxaban | AF         | aPCC            | no       | yes   |
| Mao G.     | 2017 | M   | 62  | ICH              | Rivaroxaban | AF         | aPCC            | no       | no    |
| Mao G.     | 2017 | F   | 77  | ICH              | Apixaban    | AF         | aPCC            | yes      | no    |
| Mao G.     | 2017 | F   | 81  | ICH              | Rivaroxaban | AF         | aPCC            | no       | yes   |
| Mao G.     | 2017 | M   | 73  | ICH              | Apixaban    | AF         | aPCC            | no       | no    |
| Mao G.     | 2017 | M   | 85  | ICH              | Rivaroxaban | AF         | aPCC            | yes      | no    |
| Mao G.     | 2017 | M   | 67  | ICH              | Rivaroxaban | AF         | aPCC            | yes      | no    |
| Marino K.  | 2016 | F   | 58  | Other            | Dabigatran  | AF         | Idarucizamab    | yes      | no    |
| Masotti L. | 2015 | F   | 93  | GI               | Dabigatran  | AF         | PCC             | yes      | no    |
| Mathais Q. | 2018 | M   | 78  | ICH              | Dabigatran  | AF         | Idarucizamab    | yes      | no    |

**Appendix H. Characteristics and endpoints for case report/series (continue)**

| Author                | Year | Sex | Age | Site of bleeding | NOAC        | Indication | Reversal agents | Reversal | Death |
|-----------------------|------|-----|-----|------------------|-------------|------------|-----------------|----------|-------|
| Maurice-Szamburski A. | 2014 | F   | 77  | ICH              | Rivaroxaban | AF         | aPCC            | yes      | no    |
| McGovern TR.          | 2015 | M   | 83  | GI               | Dabigatran  | AF         | PCC             | yes      | no    |
| Means L.              | 2016 | M   | 64  | GI               | Rivaroxaban | VTE        | PCC             | yes      | no    |
| Means L.              | 2016 | M   | 64  | GI               | Rivaroxaban | VTE        | PCC             | yes      | no    |
| Molina M.             | 2014 | F   | 84  | ICH              | Rivaroxaban | AF         | FFP             | yes      | no    |
| Moore CH.             | 2012 | F   | 78  | GI               | Dabigatran  | AF         | FFP             | yes      | no    |
| Mourafetis J.         | 2018 | M   | 77  | GI               | Dabigatran  | AF         | PCC+rFVIIa      | yes      | no    |
| NannapaneniN.         | 2014 | F   | 39  | Other            | Rivaroxaban | VTE        | aPCC            | no       | no    |
| Novak JE.             | 2018 | M   | 71  | Other            | Dabigatran  | AF         | Idarucizamab    | no       | yes   |
| Pahs L.               | 2015 | M   | 62  | GI               | Rivaroxaban | AF         | PCC             | yes      | no    |
| Pahs L.               | 2015 | M   | 49  | ICH              | Rivaroxaban | AF         | PCC+FFP         | yes      | no    |
| Pahs L.               | 2015 | M   | 87  | ICH              | Dabigatran  | AF         | rFVIIa+FFP      | yes      | no    |
| Pahs L.               | 2015 | M   | 77  | GI               | Dabigatran  | AF         | rFVIIa+FFP      | no       | yes   |
| Pakraftar S.          | 2014 |     | 64  | ICH              | Dabigatran  | AF/VTE     | FFP             | yes      | no    |
| Pakraftar S.          | 2014 |     | 82  | ICH              | Dabigatran  | AF/VTE     | rFVIIa+FFP      | yes      | no    |
| Pakraftar S.          | 2014 |     | 86  | ICH              | Dabigatran  | AF/VTE     | rFVIIa+FFP      | yes      | no    |
| Pakraftar S.          | 2014 |     | 86  | ICH              | Dabigatran  | AF/VTE     | FFP             | yes      | no    |
| Pakraftar S.          | 2014 |     | 89  | ICH              | Dabigatran  | AF/VTE     | FFP             | yes      | no    |
| Pakraftar S.          | 2014 |     | 94  | ICH              | Dabigatran  | AF/VTE     | FFP             | yes      | no    |

**Appendix H. Characteristics and endpoints for case report/series (continue)**

| Author            | Year | Sex | Age | Site of bleeding | NOAC        | Indication | Reversal agents  | Reversal | Death |
|-------------------|------|-----|-----|------------------|-------------|------------|------------------|----------|-------|
| Paul S.           | 2015 | F   | 67  | GI               | Dabigatran  | AF         | FFP              | yes      | no    |
| Plener I.         | 2014 | M   | 80  | GI               | Dabigatran  | AF         | aPCC+FFP         | yes      | no    |
| Purrucker JC.     | 2014 | F   | 76  | ICH              | Rivaroxaban | AF         | PCC              | no       | yes   |
| Quintard H.       | 2017 | M   | 70  | Other            | Dabigatran  | AF         | PCC+Idarucizumab | yes      | no    |
| Quintavalla R.    | 2018 | F   | 82  | ICH              | Dabigatran  | AF         | Idarucizumab     | yes      | no    |
| Riario Sforza GG. | 2018 | F   | 87  | GI               | Dabigatran  | AF         | Idarucizumab     | yes      | no    |
| Rinehart DR.      | 2015 | M   | 76  | ICH              | Apixaban    | AF         | aPCC             | yes      | no    |
| Ross B.           | 2014 |     |     | GI               | Dabigatran  | AF         | FFP              | yes      | no    |
| Ross B.           | 2014 |     |     | GI               | Dabigatran  | AF         | FFP              | yes      | no    |
| Ross B.           | 2014 |     |     | ICH              | Dabigatran  | AF         | rFVIIa+FFP       | no       | yes   |
| Ross B.           | 2014 |     |     | GI               | Dabigatran  | AF         | FFP              | yes      | no    |
| Ross B.           | 2014 |     |     | ICH              | Dabigatran  | AF         | FFP              | no       | yes   |
| Ross B.           | 2014 |     |     | ICH              | Dabigatran  | AF         | rFVIIa+FFP       | no       | yes   |
| Schaeffer S.      | 2013 | F   | 78  | GI               | Dabigatran  | AF         | FFP              | no       | yes   |
| Schulman S.       | 2014 | M   | 84  | ICH              | Dabigatran  | AF         | aPCC             | yes      | no    |
| Schulman S.       | 2014 | F   | 81  | ICH              | Dabigatran  | AF         | aPCC             | yes      | no    |
| Schulman S.       | 2014 | F   | 83  | GI               | Dabigatran  | AF         | aPCC             | yes      | no    |
| Senger S.         | 2016 |     | 84  | ICH              | Rivaroxaban | AF         | PCC              | yes      | yes   |
| Senger S.         | 2016 |     | 82  | ICH              | Dabigatran  | AF         | PCC              | yes      | no    |

**Appendix H. Characteristics and endpoints for case report/series (continue)**

| Author     | Year | Sex | Age | Site of bleeding | NOAC        | Indication | Reversal agents | Reversal | Death |
|------------|------|-----|-----|------------------|-------------|------------|-----------------|----------|-------|
| Senger S.  | 2016 |     | 76  | ICH              | Dabigatran  | AF         | PCC             | no       | yes   |
| Senger S.  | 2016 |     | 88  | ICH              | Rivaroxaban | AF         | PCC             | yes      | no    |
| Senger S.  | 2016 |     | 75  | ICH              | Rivaroxaban | AF         | PCC             | yes      | yes   |
| Senger S.  | 2016 |     | 73  | ICH              | Rivaroxaban | AF         | PCC             | yes      | no    |
| Senger S.  | 2016 |     | 79  | ICH              | Rivaroxaban | AF         | PCC+rFVIIa      | no       | no    |
| Senger S.  | 2016 |     | 80  | ICH              | Dabigatran  | VTE        | PCC             | yes      | no    |
| Senger S.  | 2016 |     | 87  | ICH              | Dabigatran  | AF         | PCC             | yes      | no    |
| Senger S.  | 2016 |     | 85  | ICH              | Dabigatran  | AF/VTE     | PCC             | yes      | no    |
| Senger S.  | 2016 |     | 78  | ICH              | Dabigatran  | AF         | PCC             | yes      | no    |
| Senger S.  | 2016 |     | 85  | ICH              | Dabigatran  | AF         | PCC             | yes      | no    |
| Senger S.  | 2016 |     | 84  | ICH              | Rivaroxaban | AF         | PCC             | no       | no    |
| Shank CD.  | 2015 |     |     | ICH              | Apixaban    | AF         | aPCC            | yes      | no    |
| Simon A.   | 2017 | M   | 77  | GI               | Dabigatran  | AF         | Idarucizamab    | yes      | yes   |
| Singh T.   | 2013 | M   | 86  | ICH              | Dabigatran  | AF         | rFVIIa+FFP      | yes      | no    |
| Singh T.   | 2013 | F   | 81  | ICH              | Dabigatran  | AF         | rFVIIa+FFP      | yes      | no    |
| Singh T.   | 2013 | M   | 65  | Other            | Dabigatran  | AF         | rFVIIa+FFP      | no       | yes   |
| Singh T.   | 2013 | F   | 77  | GI               | Dabigatran  | AF         | FFP             | yes      | no    |
| Song S.    | 2017 | M   | 84  | Other            | Dabigatran  | AF         | Idarucizamab    | yes      | no    |
| Steele AP. | 2018 | M   | 86  | GI               | Dabigatran  | AF         | aPCC+FFP        | no       | yes   |

**Appendix H. Characteristics and endpoints for case report/series (continue)**

| Author         | Year | Sex | Age | Site of bleeding | NOAC       | Indication | Reversal agents | Reversal | Death |
|----------------|------|-----|-----|------------------|------------|------------|-----------------|----------|-------|
| Steele AP.     | 2018 | F   | 62  | GI               | Dabigatran | AF         | aPCC+FFP        | no       | yes   |
| Stollberger C. | 2012 | M   | 85  | Other            | Dabigatran | AF         | FFP             | yes      | no    |
| Stollberger C. | 2014 | F   | 89  | Other            | Dabigatran | AF         | PCC             | yes      | no    |
| Thorborg C.    | 2016 | F   | 79  | GI               | Dabigatran | AF         | Idarucizamab    | yes      | no    |
| Tsai LK.       | 2018 | M   | 77  | ICH              | Dabigatran | AF         | Idarucizamab    | yes      | no    |
| Tsai LK.       | 2018 | M   | 83  | GI               | Dabigatran | AF         | Idarucizamab    | yes      | no    |
| Tsai LK.       | 2018 | M   | 81  | ICH              | Dabigatran | AF         | Idarucizamab    | yes      | no    |
| Tsai LK.       | 2018 | M   | 78  | ICH              | Dabigatran | AF         | Idarucizamab    | yes      | no    |
| Tsai LK.       | 2018 | M   | 74  | ICH              | Dabigatran | AF         | Idarucizamab    | yes      | no    |
| Tsai LK.       | 2018 | F   | 78  | ICH              | Dabigatran | AF         | Idarucizamab    | yes      | no    |
| Tsai LK.       | 2018 | F   | 87  | ICH              | Dabigatran | AF         | Idarucizamab    | yes      | no    |
| Tsai LK.       | 2018 | M   | 79  | ICH              | Dabigatran | AF         | Idarucizamab    | yes      | no    |
| Vosko MR.      | 2017 | M   | 88  | ICH              | Dabigatran | AF         | Idarucizamab    | yes      | no    |
| Vosko MR.      | 2017 | M   | 87  | ICH              | Dabigatran | AF         | Idarucizamab    | yes      | no    |
| Vosko MR.      | 2017 | F   | 93  | Other            | Dabigatran | AF         | Idarucizamab    | yes      | no    |
| Vosko MR.      | 2017 | F   | 44  | ICH              | Dabigatran | VTE        | Idarucizamab    | yes      | no    |
| Vosko MR.      | 2017 | M   | 83  | Other            | Dabigatran | AF         | Idarucizamab    | yes      | no    |
| Warkentin TE.  | 2012 | M   | 79  | Other            | Dabigatran | AF         | rFVIIa          | yes      | no    |
| Wyckowski MK.  | 2012 | F   | 66  | Other            | Dabigatran | AF         | PCC             | yes      | no    |

**Appendix H. Characteristics and endpoints for case report/series (continue)**

| Author       | Year | Sex | Age | Site of bleeding | NOAC        | Indication | Reversal agents | Reversal | Death |
|--------------|------|-----|-----|------------------|-------------|------------|-----------------|----------|-------|
| Yoshimura S. | 2017 | M   | 66  | ICH              | Rivaroxaban | AF         | PCC             | yes      | no    |
| Yoshimura S. | 2017 | F   | 82  | Other            | Apixaban    | AF         | PCC             | yes      | no    |
| Yoshimura S. | 2017 | M   | 72  | GI               | Rivaroxaban | AF         | PCC             | no       | no    |
| Yoshimura S. | 2017 | F   | 87  | ICH              | Rivaroxaban | AF         | PCC             | yes      | no    |
| Yoshimura S. | 2017 | M   | 76  | ICH              | Rivaroxaban | AF         | PCC             | yes      | no    |
| Yoshimura S. | 2017 | F   | 80  | ICH              | Dabigatran  | AF         | PCC             | yes      | no    |
| Yoshimura S. | 2017 | M   | 76  | ICH              | Rivaroxaban | AF         | PCC             | no       | no    |
| Yoshimura S. | 2017 | M   | 65  | Other            | Rivaroxaban | AF         | PCC             | no       | no    |
| Yoshimura S. | 2017 | F   | 67  | Other            | Apixaban    | AF         | PCC             | no       | no    |
